# Supplementary material for: Highly-efficient photocatalytic hydrogen evolution triggered by spatial confinement effects over co-crystal templated boron-doped carbon nitride hollow nanotubes
Source: Royal Society of Chemistry journal article supplement (doi:10.1039/d3ta00199g), 2023-01-01
Supplement: d3ta00199g1.pdf [file d3ta00199g1.pdf]

**Highly-efficient Photocatalytic Hydrogen Evolution Triggered by Spatial  
Confinement Effects over Co-crystal Templated Boron-doped Carbon Nitride  
Hollow Nanotubes**

Wei Dai <sup>a, b</sup>, Ranhao Wang <sup>b</sup>, Zhijie Chen <sup>b</sup>, Shimao Deng <sup>b</sup>, Changzhu Huang <sup>b</sup>,  
Wenjun Luo <sup>a,\*</sup>, Hong Chen <sup>b,\*</sup>

<sup>a</sup> Faculty of Materials Science and Chemistry, China University of Geosciences, No. 68  
Jincheng Street, Esat Lake High-tech Department Zone, Wuhan, Hubei, China.

<sup>b</sup> Shenzhen Key Laboratory of Interfacial Science and Engineering of Materials, State  
Environmental Protection Key Laboratory of Integrated Surface Water-Groundwater  
Pollution Control, Guangdong Provincial Key Laboratory of Soil and Groundwater  
Pollution Control, School of Environmental Science and Engineering, Southern  
University of Science and Technology, Shenzhen 518055, China

\*Corresponding authors:

E-mail address: [luowj@cug.edu.cn](mailto:luowj@cug.edu.cn) (Wenjun Luo); [chenh3@sustech.edu.cn](mailto:chenh3@sustech.edu.cn) (Hong  
Chen)

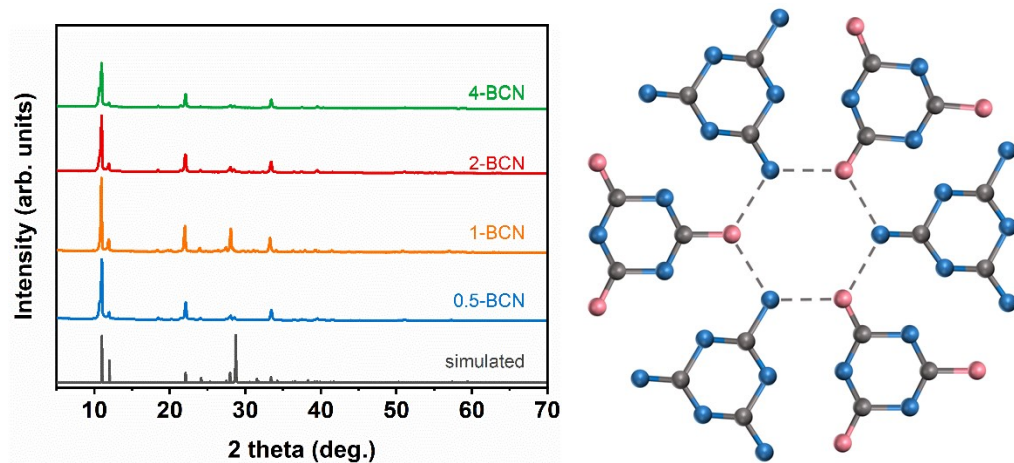

**Fig. S1.** XRD patterns of  $x$ -BCN ( $x=0.5, 1, 2, 4$ ) with different molar ratios of  $\text{HBO}_3$  (0.5, 1, 2, 4 mmol).

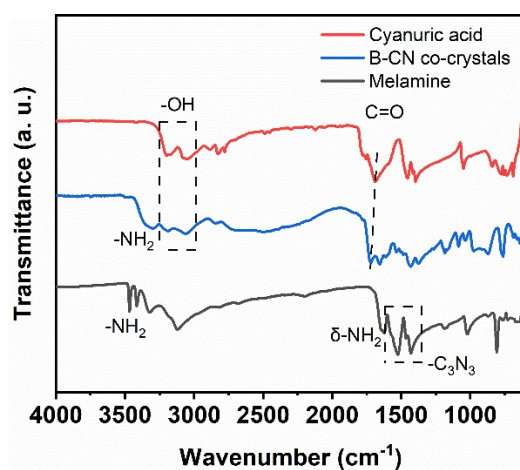

**Fig. S2.** The FT-IR spectra of commercial melamine, cyanuric acid and B-CN co-crystals.

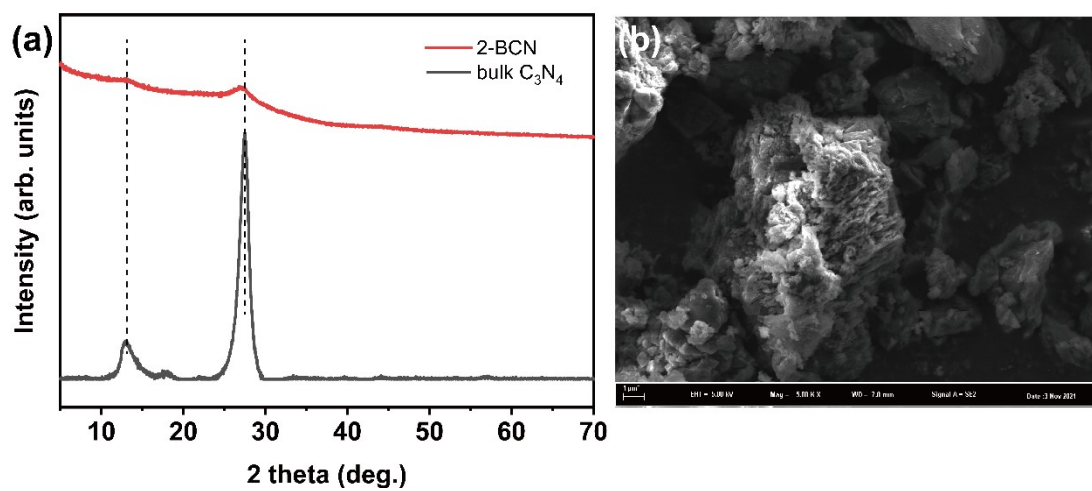

**Fig. S3.** The XRD pattern (a) of 2-BCN bulk C<sub>3</sub>N<sub>4</sub>. (b) SEM of bulk C<sub>3</sub>N<sub>4</sub>.

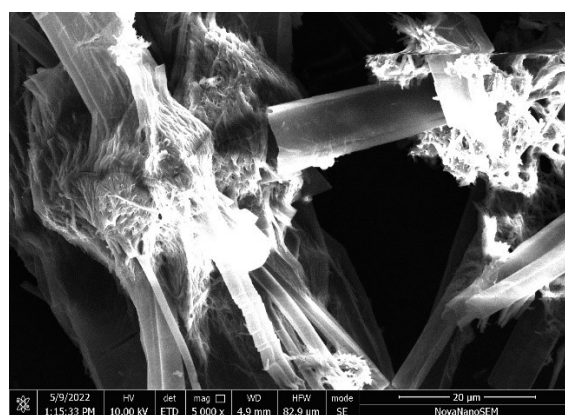

**Fig. S4.** SEM of carbon nitride formed without boric acid-assisted pyrolysis.

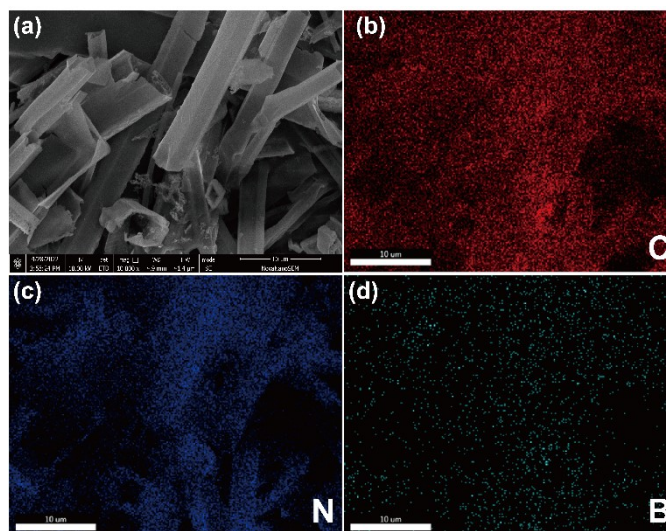

Fig. S5. SEM images of 2-BCN and correspond elements mapping of C, N, B.

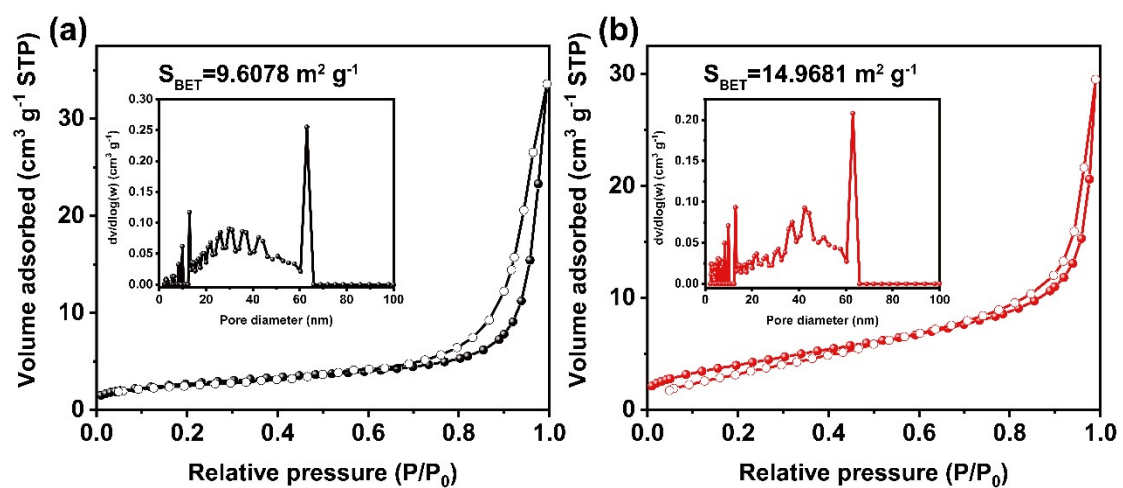

Fig. S6.  $N_2$  adsorption-desorption isotherms and the corresponding pore size distribution curves (inset) of (a) bulk  $C_3N_4$ , (b) 2-BCN.

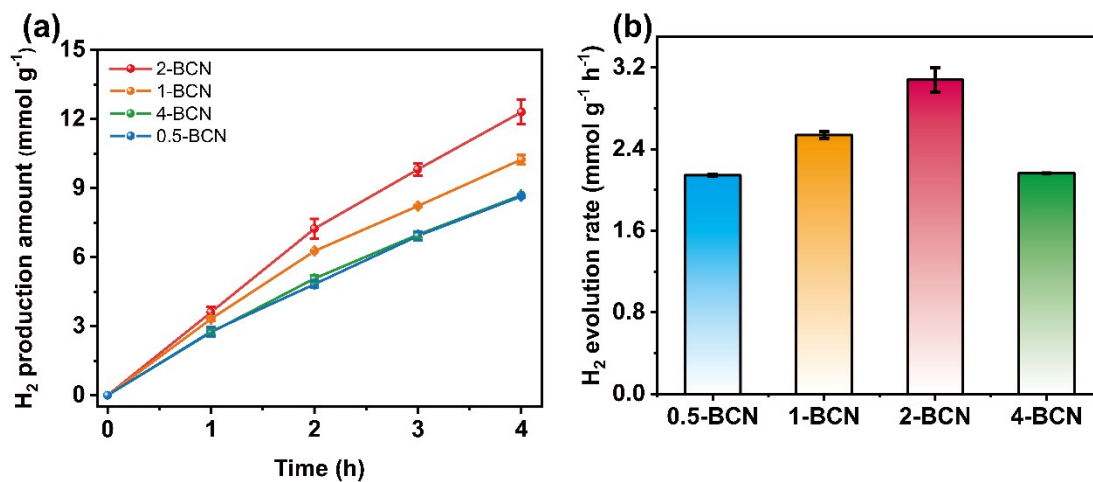

**Fig. S7.** (a) Photocatalytic H<sub>2</sub> production amount and evolution rates of x-BCN (x=0.5, 1, 2, 4).

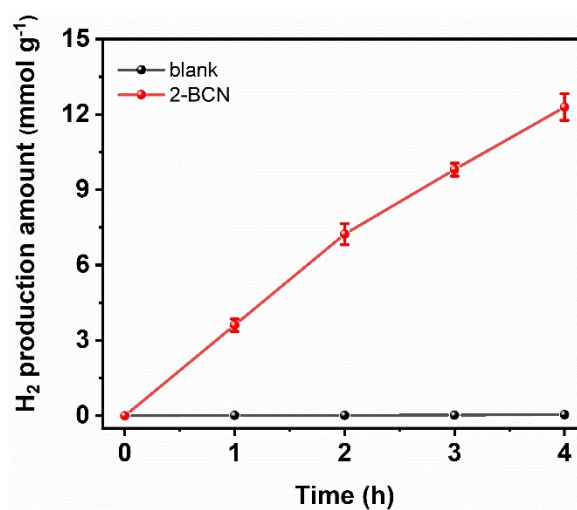

**Fig. S8.** Photocatalytic H<sub>2</sub> production amount of 2-BCN (red line) and without photocatalysts (blank line)

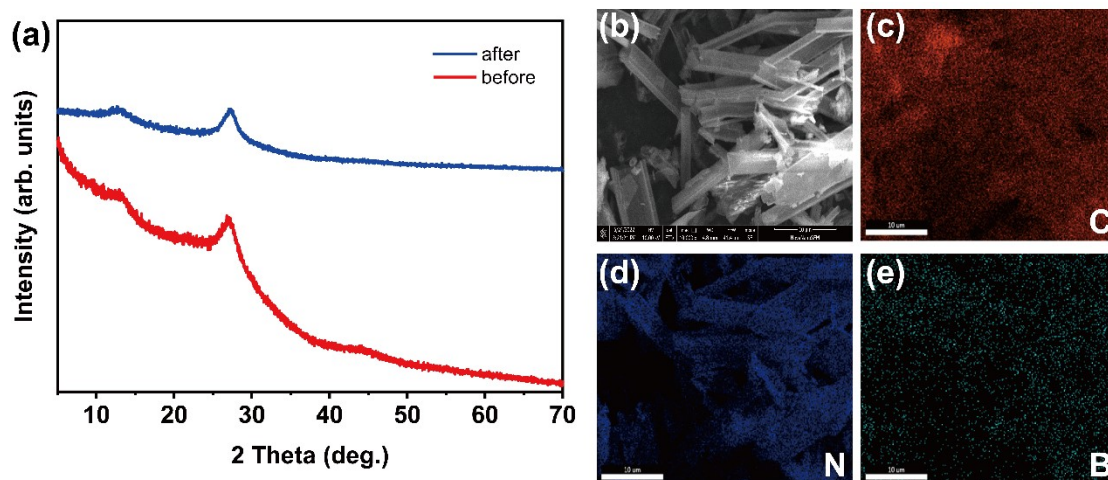

**Fig. S9.** (a) XRD of 2-BCN before and after eight photocatalyst hydrogen evolution. (b) SEM and (c-e) correspond elements mapping of 2-BCN after photocatalyst hydrogen evolution.

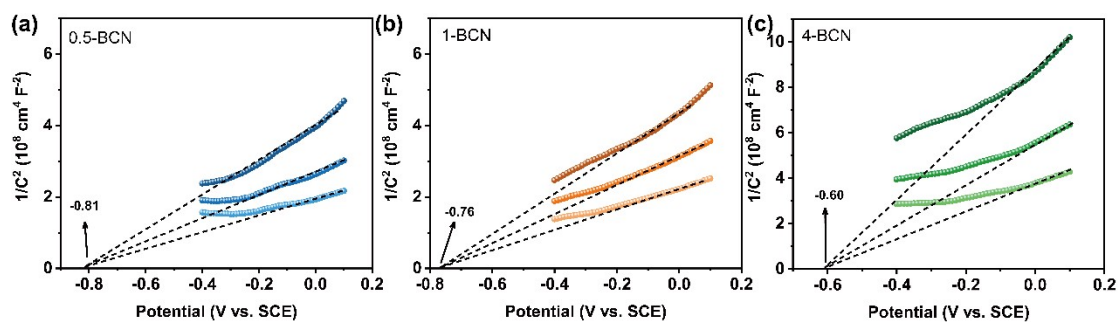

**Fig. S10.** (a-c) Mott-Schottky plots of x-BCN (x=0.5, 1, 4).



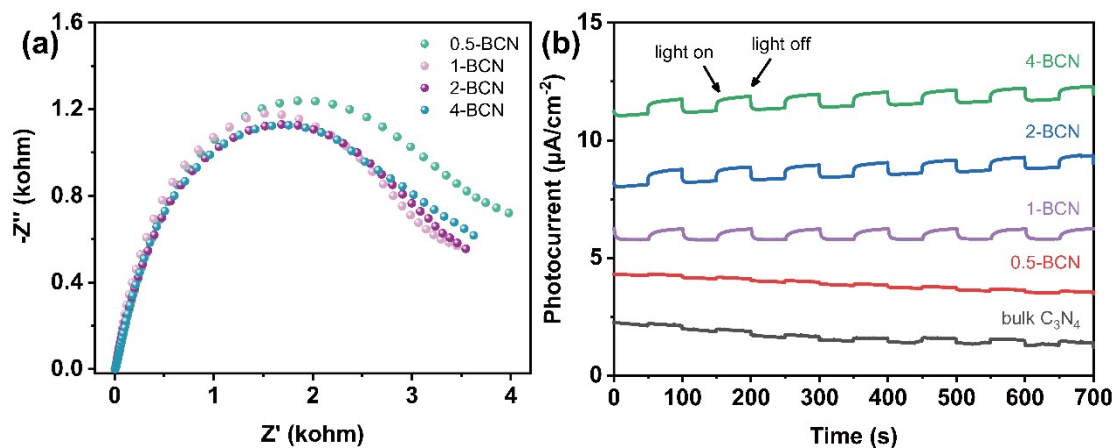

**Fig. S11.** (a) EIS plots and (b) transient photocurrent responses of x-BCN (x=0.5, 1, 2, 4).

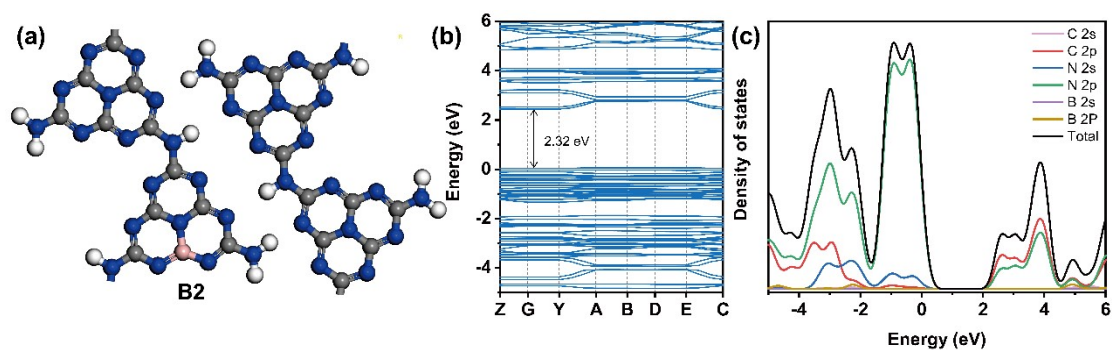

**Fig. S12.** (a) Structure models of x-BCN with B2-site dopants. (b) Calculated band structures and (c) corresponding density of states (DOS) calculations of x-BCN with B2-site dopants.

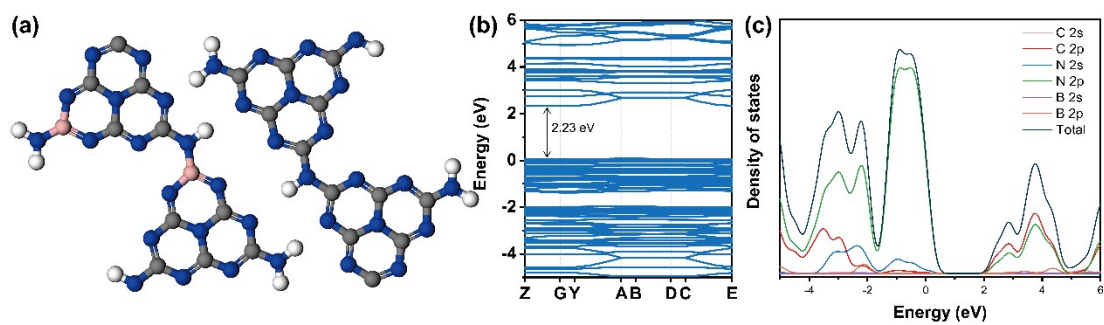

**Fig. S13.** (a) Structure models, (b) Calculated band structures and (c) corresponding density of states (DOS) of BCN with two C2 atoms substituted by B.

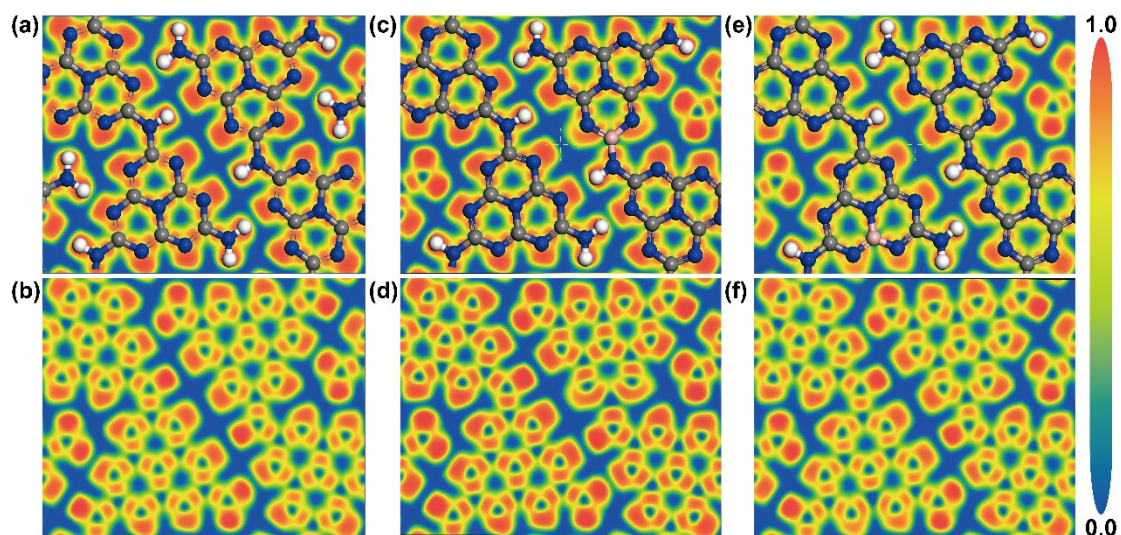

**Fig. S14.** Electron localization function spectrums of pristine C<sub>3</sub>N<sub>4</sub> (a, b), x-BCN with B1-site dopants (c, d), and x-BCN with B2-site dopants (e, f).



**Table S1.** Comparison of photocatalytic hydrogen evolution performance over similar materials.

| photocatalyst | amt. (mg) | experimental conditions                             | H <sub>2</sub> evolution rate (μmol·g <sup>-1</sup> ·h <sup>-1</sup> ) | Reference        |
|---------------|-----------|-----------------------------------------------------|------------------------------------------------------------------------|------------------|
| P-TCN         | 100       | 80 mL H <sub>2</sub> O and 20 mL methanol, 1 wt% Pt | 67                                                                     | [1]              |
| TCN           | 25        | 25 ml H <sub>2</sub> O and 5 mL TEOA*, 3wt% Pt      | 2098                                                                   | [2]              |
| UCN-200       | 30        | 45 ml H <sub>2</sub> O and 5 mL TEOA, 3wt% Pt       | 1254.7                                                                 | [3]              |
| D-TCN450      | 25        | 25 ml H <sub>2</sub> O and 5 mL TEOA, 3wt% Pt       | 789.2                                                                  | [4]              |
| <b>2-BCN</b>  | <b>30</b> | 45 ml H <sub>2</sub> O and 5 mL TEOA, 3wt% Pt       | <b>3065.8</b>                                                          | <b>This work</b> |

\*TEOA: Triethanolamine.

**Table S2.** Summary of the time-resolved PL decay spectra for the prepared sample bulk C<sub>3</sub>N<sub>4</sub> and 2-BCN.

| Sample                             | A <sub>1</sub> | A <sub>2</sub> | A <sub>3</sub> | τ <sub>1</sub> (ns) | τ <sub>2</sub> (ns) | τ <sub>3</sub> (ns) | τ <sub>avg</sub> (ns) | R <sup>2</sup> |
|------------------------------------|----------------|----------------|----------------|---------------------|---------------------|---------------------|-----------------------|----------------|
| Bulk C <sub>3</sub> N <sub>4</sub> | 162.728        | 464.8410       | 163.6261       | 0.2937              | 1.4719              | 5.3829              | 3.5729                | 0.993          |
| 2-BCN                              | 1              | 422.7973       | 143.1008       | 0.2972              | 1.2652              | 4.9404              | 3.1945                | 0.992          |
|                                    | 6              |                |                |                     |                     |                     |                       | 9              |

The obtained TR-PL curves are mathematically expressed by a three-exponential equation[5]:

$$I(t) = A_1 e^{-\frac{t}{\tau_1}} + A_2 e^{-\frac{t}{\tau_2}} + A_3 e^{-\frac{t}{\tau_3}} \quad (1)$$

where, A<sub>1</sub>, A<sub>2</sub> and A<sub>3</sub> represent the normalized amplitudes of each decay component and τ<sub>1</sub>, τ<sub>2</sub> and τ<sub>3</sub> are values of the lifetime components, respectively.

$$\tau_{avg} = (A_1 \tau_1^2 + A_2 \tau_2^2 + A_3 \tau_3^2) / (A_1 \tau_1 + A_2 \tau_2 + A_3 \tau_3) \quad (2)$$

## Reference

1. Guo S., Deng Z., Li M., et al. Phosphorus-Doped Carbon Nitride Tubes with a Layered Micro-nanostructure for Enhanced Visible-Light Photocatalytic Hydrogen Evolution[J]. *Angewandte Chemie International Edition*, 2016, 55(5): 1830-1834.
2. Wang W., Wang M., Li X., et al. Microwave-Assisted Catalytic Cleavage of C–C Bond in Lignin Models by Bifunctional Pt/CDC-SiC[J]. *ACS Sustainable Chemistry & Engineering*, 2020, 8(1): 38-43.
3. Chen L., Liang X., Wang H., et al. Ultra-thin carbon nitride nanosheets for efficient photocatalytic hydrogen evolution[J]. *Chemical Engineering Journal*, 2022, 442: 136115.
4. Chen L., Wang Y., Cheng S., et al. Nitrogen defects/boron dopants engineered tubular carbon nitride for efficient tetracycline hydrochloride photodegradation and hydrogen evolution[J]. *Applied Catalysis B: Environmental*, 2022, 303: 120932.
5. Kumar P., Vahidzadeh E., Thakur U.K., et al. C<sub>3</sub>N<sub>5</sub>: A Low Bandgap Semiconductor Containing an Azo-Linked Carbon Nitride Framework for Photocatalytic, Photovoltaic and Adsorbent Applications[J]. *Journal of the American Chemical Society*, 2019, 141(13): 5415-5436.
